# Supplementary material for: Evaluation of dual layered photoanode for enhancement of visible-light-driven applications
Source: Royal Society of Chemistry journal article supplement (doi:10.1039/c9ra02074h), 2019-01-01

**ESI 1. Cross-sectional images of dual layered film (a) after FIB and (b) magnifying the interface between ternary structures and TCN using HRTEM.**

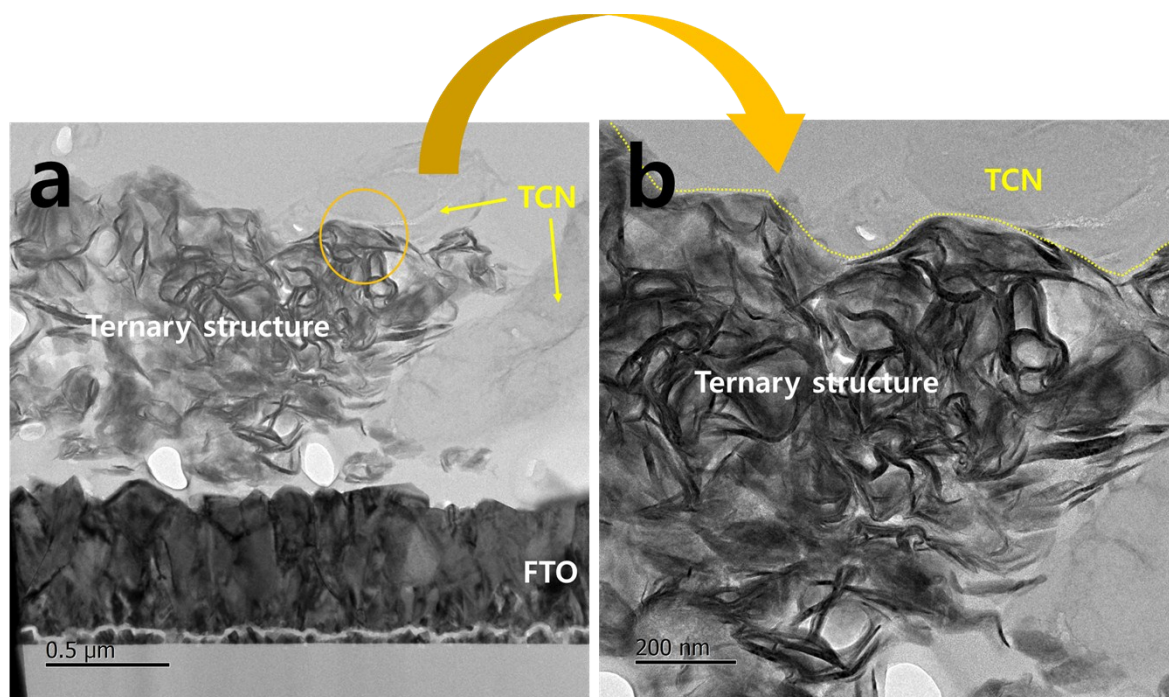

## ESI 2. Photoluminescence analysis with magnification of PL intensity for ternary structures

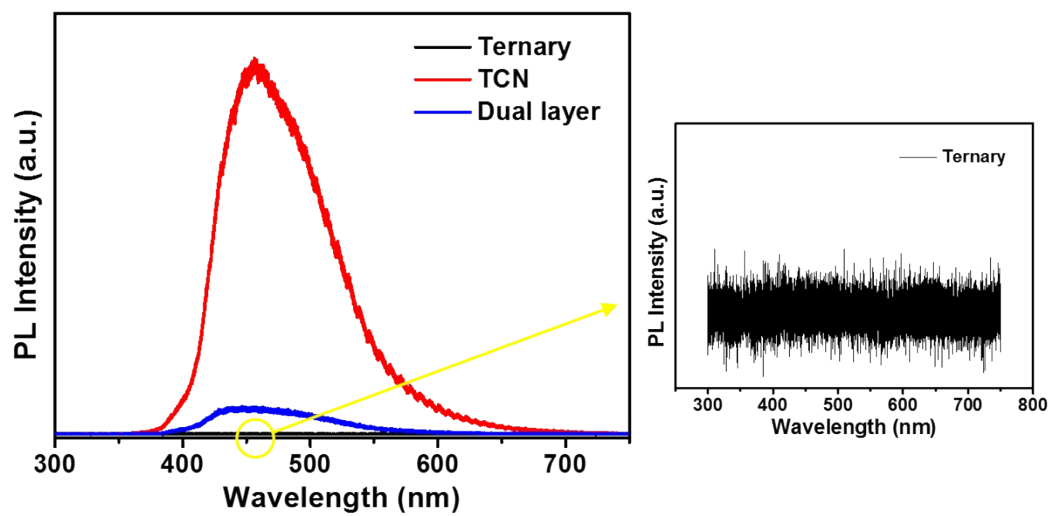

**ESI 3. Experimental set-up of (a) photodegradation activity for MB removal and (b) H<sub>2</sub> evolution using as-prepared films.**

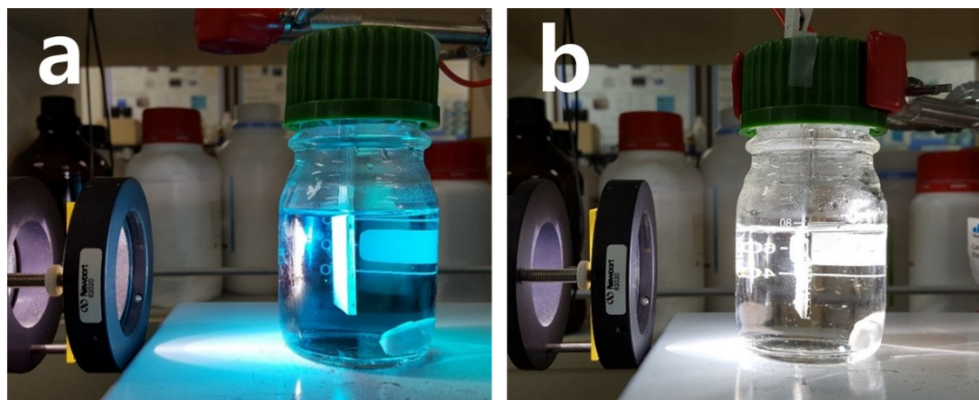

ESI 4. Nyquist plots of TCN film and dual layered film across the entire range.

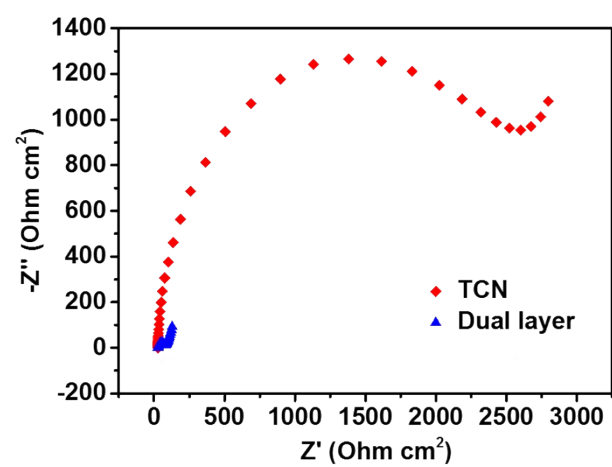

Supplement: c9ra02074h1.pdf [file c9ra02074h1.pdf]
